# Supplementary material
Source: HighWire-hosted journal article supplement (https://bmjopen.bmj.com/content/7/8/e016670)

Funnel plot with pseudo 95% confidence limits

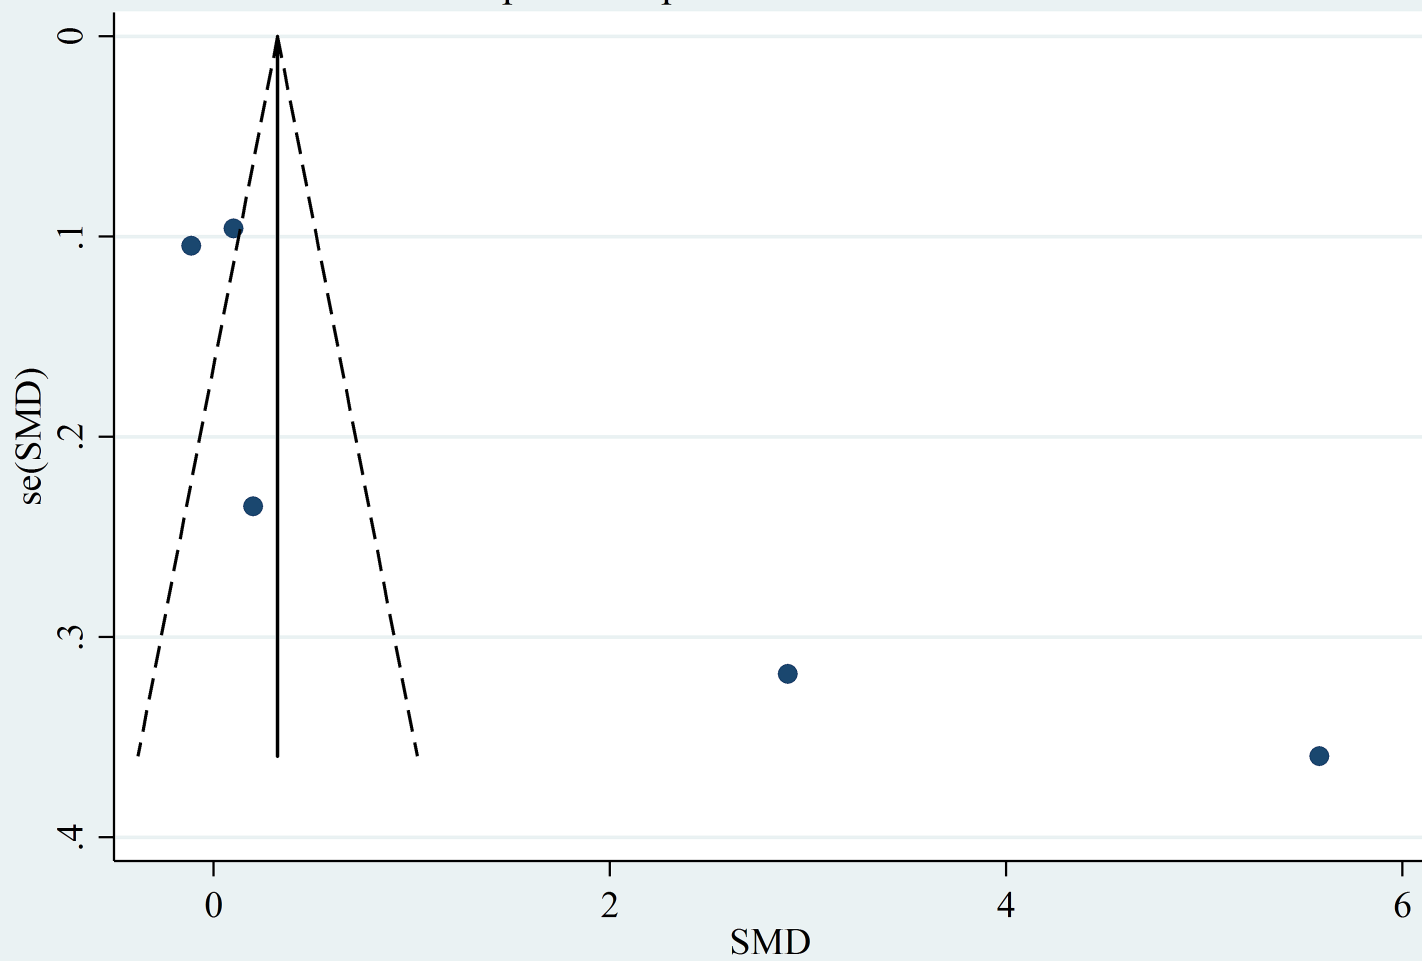

Supplement: inline-supplementary-material-12 [file inline-supplementary-material-12.pdf]
